# Supplementary material for: Co-pyrolysis synthesis of Fe3BO6 nanorods as high performance anodes for lithium-ion batteries
Source: Royal Society of Chemistry journal article supplement (doi:10.1039/c3ra46482b), 2014-01-01
Supplement: c3ra46482b.pdf [file c3ra46482b.pdf]

# Co-pyrolysis synthesis of $\text{Fe}_3\text{BO}_6$ nanorods as high performance anodes for lithium-ion batteries

**Shouli Li,<sup>a</sup> Liqiang Xu,<sup>a\*</sup> Yanjun Zhai<sup>a</sup> and Hongxiao Yu<sup>b</sup>**

<sup>a</sup> Key Laboratory of Colloid and Interface Chemistry, Shandong University, Ministry of Education, School of Chemistry and Chemical Engineering, Jinan 250100, P. R. China.

<sup>b</sup> China Tobacco Shandong Industrial Corporation, Jinan, 250100, P. R. China

Tel: +86-531-88364543, E-mail: xulq@sdu.edu.cn (L. Xu), Fax: +86-531-88366280

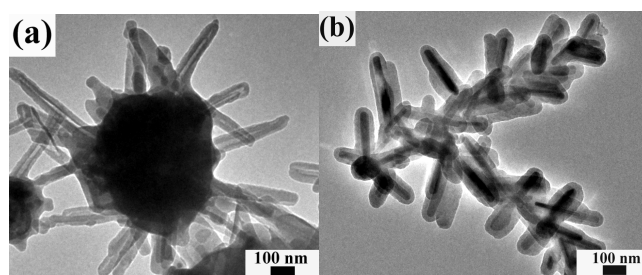

Fig. S1 TEM images of the products obtained at different stages: (a) intermediates; (b) raw product without calcinations; (c) product after calcinations.

Fig.S1a displays the TEM image of the intermediate product, in which the hollow carbon nanotubes (originate from the decomposition of ferrocene and ethanol) co-existed with iron-related microparticles can be clear observed. The composition of the inner microparticle is confirmed by the FESEM EDS spectrum to be composed of Fe, B and O elements. With the prolonged reaction time, the microparticle is believed gradually permeates into the hollow cavities of carbon nanotubes. Fig. S1b shows the TEM image of the raw product with core-shell structure before calcinations. After subsequent calcinations of the as-obtained core-shell like composites,  $\text{Fe}_3\text{BO}_6$  nanorods were obtained with a high yield.

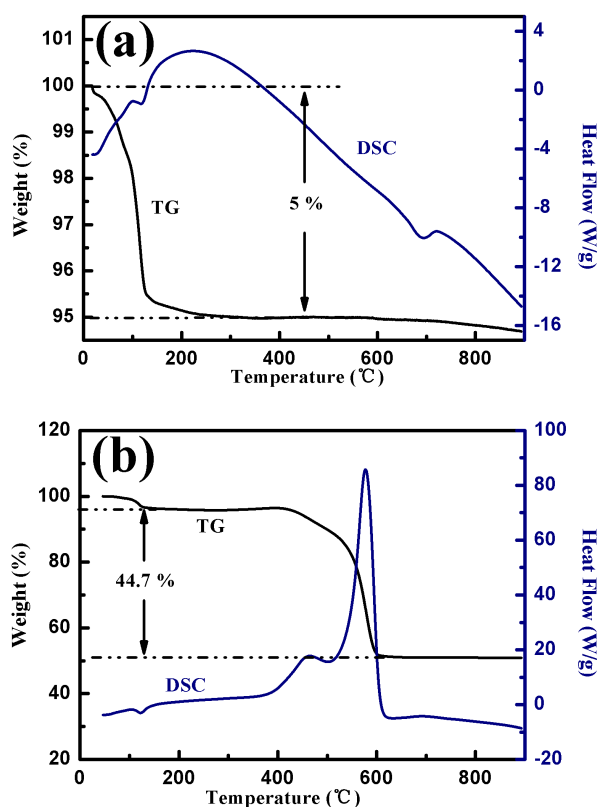

Fig. S2 TG-DSC curves recorded from room temperature to 900 °C at a heating rate of 10 °C min<sup>-1</sup>

under air atmosphere: (a)  $\text{Fe}_3\text{BO}_6$  nanorods; (b)  $\text{Fe}_3\text{BO}_6$ @C.

In order to identify the thermal stability of the products ( $\text{Fe}_3\text{BO}_6$  and  $\text{Fe}_3\text{BO}_6$ @C) and the carbon content of

the  $\text{Fe}_3\text{BO}_6@\text{C}$ , thermal gravimetric-differential scanning calorimetry (TG-DSC) analysis was carried out. Fig. S2a presents the TG-DSC curve of  $\text{Fe}_3\text{BO}_6$  nanorods. The little weight loss (about 5%) of the sample mainly occurs before 200 °C, which is probably due to the elimination of the absorbed water on their surfaces, then the product remain almost stable below 900 °C. The TG-DSC curve of  $\text{Fe}_3\text{BO}_6@\text{C}$  is shown in Fig. S2b, the weight loss mainly occurs between 400 °C and 600 °C, which can be ascribed to the loss of graphite. The content of graphite in  $\text{Fe}_3\text{BO}_6@\text{C}$  is about 44.7 % according to the calculation results, then it remains stable even at 900 °C. The above analyses results indicating the relative high thermal stability of the as-obtained products.
